# Supplementary material for: Study of the Properties of CdS:Al (R = [Al3+]/[Cd2+] = 0.30, 0.40, 0.50) Thin Films Grown by the CBD Method in an Ammonia-Free System
Source: MDPI journal article supplement (doi:10.3390/molecules28083626), 2023-04-21
Supplement: s1 [file s1]

Article

# Study of the properties of CdS:Al ( $R = [Al]/[Cd] = 0.30, 0.40, 0.50$ ) thin films grown by the CBD method in an ammonia-free system

R. Prasanna-Kumari <sup>1</sup>, Daniela Herrera-Molina <sup>1</sup>, Arturo Fernández-Pérez <sup>2</sup>, Jesús E. Diosa <sup>1,3</sup>,  
Edgar Mosquera-Vargas <sup>1, 3,\*</sup>,

<sup>1</sup> Grupo de Transiciones de Fase y Materiales Funcionales, Departamento de Física, Universidad del Valle, Santiago de Cali 760032, Colombia;

[prasanna.raju@correounivalle.edu.co](mailto:prasanna.raju@correounivalle.edu.co), [daniela.herrera.molina@correounivalle.edu.co](mailto:daniela.herrera.molina@correounivalle.edu.co)

<sup>2</sup> Departamento de Física, Facultad de Ciencias, Universidad del Bio-Bio, Collao 1202, Concepción 4030000, Chile; [arturofe@ubiobio.cl](mailto:arturofe@ubiobio.cl)

<sup>3</sup> Centro de Excelencia en Nuevos Materiales (CENM), Universidad del Valle, Santiago de Cali 760032, Colombia; [jesus.diosa@correounivalle.edu.co](mailto:jesus.diosa@correounivalle.edu.co),

\* Correspondence: [edgar.mosquera@correounivalle.edu.co](mailto:edgar.mosquera@correounivalle.edu.co) (EM-V)

## Supporting information

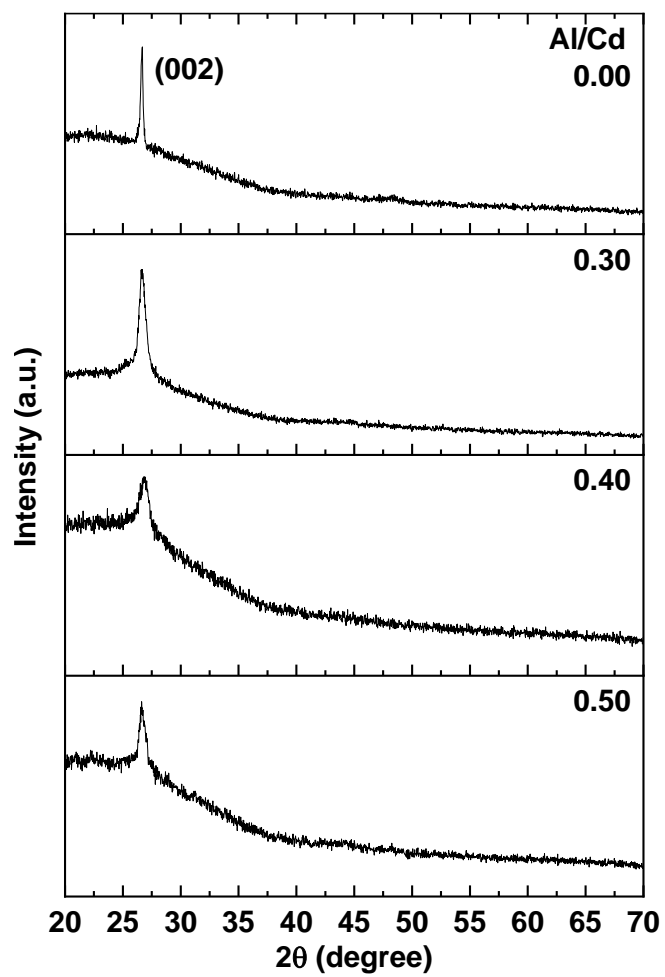

Figure S1. XRD pattern of thin films grown at different [Al]/[Cd] ratios. From Ref. [1].

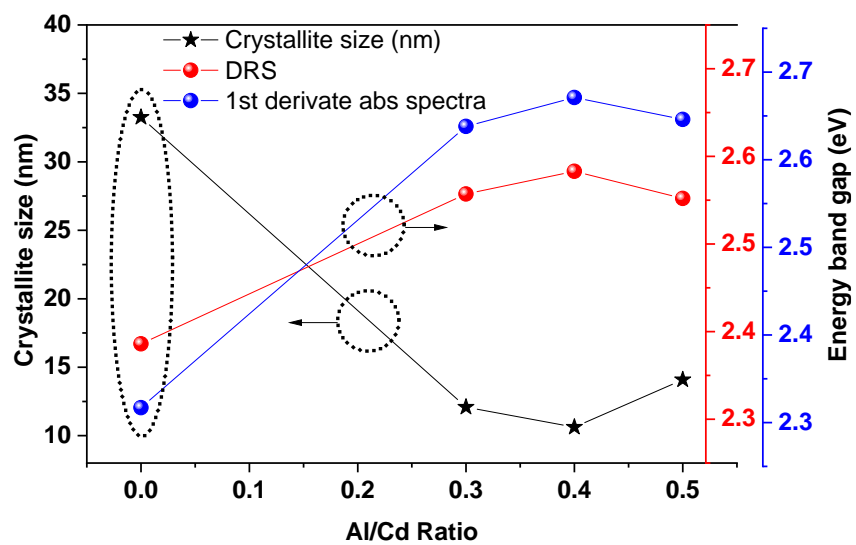

Figure S2 Crystallite size and energy gap versus [A]/[Cd] ratio for the thin films. From Ref. [1].
